# Supplementary material
Source: PubMed Central journal article supplement (PMC2787874)
Supplement: NIHMS95832-supplement-1_si_001.pdf [file NIHMS95832-supplement-1_si_001.pdf]

## Supporting Information

### Substituent Effects in Cation/ $\pi$ Interactions and Electrostatic Potentials above the Center of Substituted Benzenes Are Due Primarily to through-Space Effects of the Substituents

Steven E. Wheeler\* and K. N. Houk\*

*Department of Chemistry and Biochemistry, University of California, Los Angeles, CA 90095*

Email: [swheele2@chem.ucla.edu](mailto:swheele2@chem.ucla.edu); [houk@chem.ucla.edu](mailto:houk@chem.ucla.edu)

| Contents                                                                                                           | Page |
|--------------------------------------------------------------------------------------------------------------------|------|
| Complete citation for refs 10 and 12                                                                               | S2   |
| Plot of M05-2X interaction energies versus CCSD(T)<br>(Figure S1)                                                  | S3   |
| Plot of deviations between additive model and $C_6H_5X \cdots Na^+$<br>interaction energies versus $R$ (Figure S2) | S3   |
| Plot of deviations between additive model and $C_6H_5X \cdots Na^+$<br>ESPs versus $R$ (Figure S3)                 | S4   |
| Absolute energies for $C_6H_5X \cdots Na^+$ and $HX \cdots Na^+$                                                   | S5   |
| Cartesian Coordinates of M05-2X/6-311+G(2df,2p) geometries                                                         | S6   |

## Complete Citations for refs 10 and 12.

E. J. Bylaska, W. A. de Jong, N. Govind, K. Kowalski, T. P. Straatsma, M. Valiev, D. Wang, E. Apra, T. L. Windus, J. Hammond, P. Nichols, S. Hirata, M. T. Hackler, Y. Zhao, P.-D. Fan, R. J. Harrison, M. Dupuis, D. M. A. Smith, J. Nieplocha, V. Tipparaju, M. Krishnan, Q. Wu, T. Van Voorhis, A. A. Auer, M. Nooijen, E. Brown, G. Cisneros, G. I. Fann, H. Fruchtl, J. Garza, K. Hirao, R. Kendall, J. A. Nichols, K. Tsemekhman, K. Wolinski, J. Anchell, D. Bernholdt, P. Borowski, T. Clark, D. Clerc, H. Dachsel, M. Deegan, K. Dyall, D. Elwood, E. Glendening, M. Gutowski, A. Hess, J. Jaffé, B. Johnson, J. Ju, R. Kobayashi, R. Kutteh, Z. Lin, R. Littlefield, X. Long, B. Meng, T. Nakajima, S. Niu, L. Pollack, M. Rosing, G. Sandrone, M. Stave, H. Taylor, G. Thomas, J. van Lenthe, A. Wong, and Z. Zhang, "NWChem, A Computational Chemistry Package for Parallel Computers, Version 5.1" (2007), Pacific Northwest National Laboratory, Richland, Washington 99352-0999, USA.

MOLPRO, version 2006.1, is a package of ab initio programs written by H.-J. Werner, P. J. Knowles, R. Lindh, F. R. Manby, M. Schütz, P. Celani, T. Korona, G. Rauhut, R. D. Amos, A. Bernhardsson, A. Berning, D. L. Cooper, M. J. O. Deegan, A. J. Dobbyn, F. Eckert, C. Hampel, G. Hetzer, A. W. Lloyd, S. J. McNicholas, W. Meyer, M. E. Mura, A. Nicklaß, P. Palmieri, R. Pitzer, U. Schumann, H. Stoll, A. J. Stone, R. Tarroni, and T. Thorsteinsson.

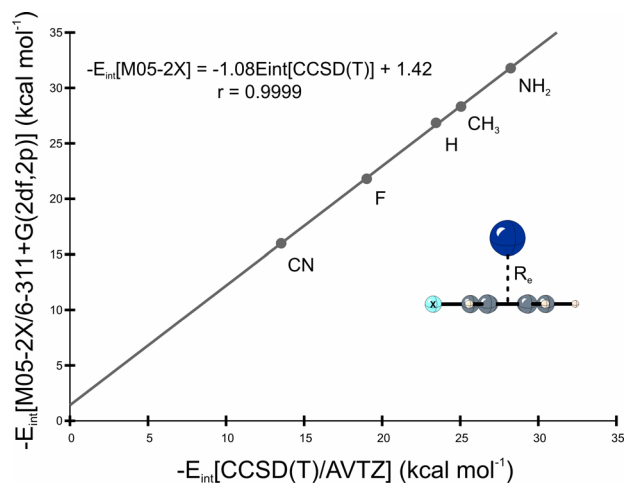

Figure S1. M05-2X/6-311+G(2df,2p) versus CCSD(T)/AVTZ interaction energies ( $\text{kcal mol}^{-1}$ ) for  $\text{C}_6\text{H}_5\text{X}\cdots\text{Na}^+$  ( $\text{X} = \text{H}, \text{CH}_3, \text{CN}, \text{F}, \text{NH}_2$ ).

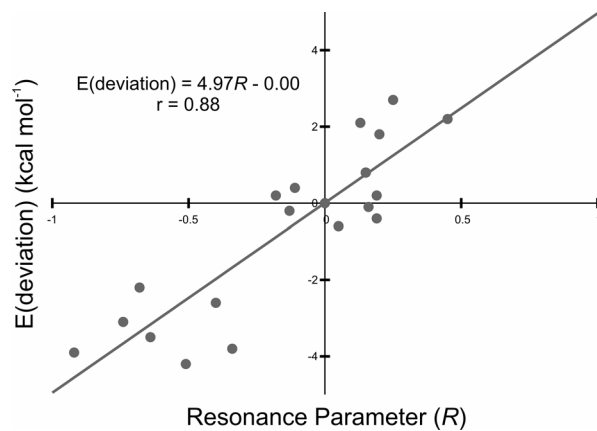

Figure S2. Deviations in interaction energies from additive model compared to intact  $\text{C}_6\text{H}_5\text{X}\cdots\text{Na}^+$  dimers [ $E(\text{deviation})$ ] versus resonance parameter  $R$ .  $E(\text{deviation}) = E_{\text{int}}(\text{C}_6\text{H}_5\text{X}\cdots\text{Na}^+) - [E_{\text{int}}(\text{H-X}\cdots\text{Na}^+) + E_{\text{int}}(\text{C}_6\text{H}_6\cdots\text{Na}^+) - E_{\text{int}}(\text{HH}\cdots\text{Na}^+)]$

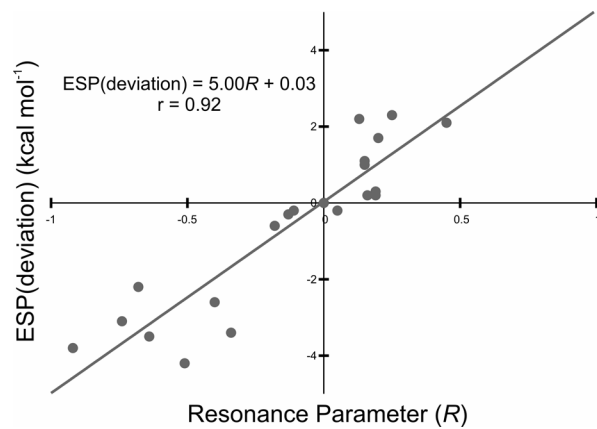

Figure S3. Deviations in electrostatic potentials (ESPs) from additive model compared to intact  $C_6H_5X \cdots Na^+$  dimers [E(deviation)] versus resonance parameter  $R$ .  $ESP(\text{deviation}) = ESP(C_6H_5) - [ESP(H-X) + ESP(C_6H_6) - ESP(HH)]$

Table S1. M05-2X/6-311+G(2df,2p) energies (hartree) of  $C_6H_5X\cdots Na^+$  and  $HX\cdots Na^+$ . Asterisks (\*) denote presence of basis functions but not the associated nuclei or electrons (for Counterpoise-corrections).

| X                                | $C_6H_5X\cdots Na^+$ | $[C_5H_6X]^*\cdots Na^+$ | $C_5H_6X\cdots [Na^+]*$ | $HX\cdots Na^+$ | $[HX]^*\cdots Na^+$ | $HX\cdots [Na^+]*$ |
|----------------------------------|----------------------|--------------------------|-------------------------|-----------------|---------------------|--------------------|
| N(CH <sub>3</sub> ) <sub>2</sub> | -528.42793           | -162.07936               | -366.29447              | -297.26413      | -162.07931          | -135.17749         |
| NHCH <sub>3</sub>                | -489.11670           | -162.07935               | -326.98462              | -257.95724      | -162.07931          | -95.87066          |
| NH <sub>2</sub>                  | -449.80417           | -162.07935               | -287.67416              | -218.65288      | -162.07931          | -56.56721          |
| CH <sub>2</sub> OH               | -508.98461           | -162.07935               | -346.85831              | -277.83053      | -162.07931          | -115.74647         |
| NHOH                             | -524.98134           | -162.07935               | -362.85564              | -293.82614      | -162.07931          | -131.74533         |
| SCH <sub>3</sub>                 | -831.94837           | -162.07935               | -669.82342              | -600.79748      | -162.07931          | -438.71300         |
| OCH <sub>3</sub>                 | -508.97611           | -162.07935               | -346.85139              | -277.82247      | -162.07931          | -115.74528         |
| CH <sub>3</sub>                  | -433.74777           | -162.07935               | -271.62328              | -202.60016      | -162.07931          | -40.51674          |
| H                                | -394.42155           | -162.07935               | -232.29941              | -163.25119      | -162.07931          | -1.16979           |
| OH                               | -469.66785           | -162.07935               | -307.54615              | -238.52161      | -162.07931          | -76.44625          |
| SH                               | -792.62338           | -162.07935               | -630.50220              | -561.47755      | -162.07931          | -399.39642         |
| SiH <sub>3</sub>                 | -685.11035           | -162.07935               | -522.98953              | -453.95482      | -162.07931          | -291.86864         |
| CCH                              | -470.58544           | -162.07935               | -308.46568              | -239.42369      | -162.07931          | -77.34568          |
| COOCH <sub>3</sub>               | -622.35565           | -162.07935               | -460.23862              | -391.19343      | -162.07931          | -229.11591         |
| COCH <sub>3</sub>                | -547.09725           | -162.07935               | -384.98257              | -315.93557      | -162.07931          | -153.85882         |
| F                                | -493.68427           | -162.07935               | -331.57017              | -262.54116      | -162.07931          | -100.47375         |
| COOH                             | -583.04591           | -162.07935               | -420.93223              | -351.88294      | -162.07931          | -189.80864         |
| OCF <sub>3</sub>                 | -806.80899           | -162.07935               | -644.69669              | -575.66552      | -162.07931          | -413.59899         |
| BF <sub>2</sub>                  | -618.56496           | -162.07935               | -456.45339              | -387.39599      | -162.07931          | -225.32113         |
| CHO                              | -507.76259           | -162.07935               | -345.65192              | -276.59721      | -162.07931          | -114.52382         |
| CF <sub>3</sub>                  | -731.56654           | -162.07935               | -569.45634              | -500.41095      | -162.07931          | -338.34110         |
| SiF <sub>3</sub>                 | -983.16934           | -162.07935               | -821.06049              | -752.00454      | -162.07931          | -589.93204         |
| NO                               | -523.72706           | -162.07935               | -361.61997              | -292.56522      | -162.07931          | -130.49533         |
| CN                               | -486.67213           | -162.07935               | -324.56729              | -255.50845      | -162.07931          | -93.44486          |
| NO <sub>2</sub>                  | -598.95405           | -162.07935               | -436.85235              | -367.79687      | -162.07931          | -205.73577         |

Table S2. CCSD(T)/AVTZ energies (hartree) of  $C_6H_5X\cdots Na^+$  and  $HX\cdots Na^+$ . Asterisks (\*) denote presence of basis functions but not the associated nuclei or electrons (for Counterpoise corrections).

| X               | $C_6H_5X\cdots Na^+$ | $[C_5H_6X]^*\cdots Na^+$ | $C_5H_6X\cdots [Na^+]*$ | $HX\cdots Na^+$ | $[HX]^*\cdots Na^+$ | $HX\cdots [Na^+]*$ |
|-----------------|----------------------|--------------------------|-------------------------|-----------------|---------------------|--------------------|
| H               | -393.80333           | -161.94472               | -231.82124              | -163.11880      | -161.94413          | -1.17266           |
| CH <sub>3</sub> | -433.04467           | -161.94482               | -271.05993              | -202.38890      | -161.94417          | -40.44072          |
| CN              | -485.88889           | -161.94473               | -323.92260              | -255.21023      | -161.94417          | -93.28074          |
| F               | -492.93776           | -161.94469               | -330.96278              | -262.28265      | -161.94412          | -100.34965         |
| NH <sub>2</sub> | -449.09292           | -161.94477               | -287.10317              | -218.42791      | -161.94416          | -56.47773          |

## Optimized Cartesian Coordinates (Angstrom)

### C<sub>6</sub>H<sub>5</sub>-X<sup>+</sup>Na<sup>+</sup> Dimer geometries

|                |             |             |             |                  |             |             |             |
|----------------|-------------|-------------|-------------|------------------|-------------|-------------|-------------|
| 13             |             |             |             | 17               |             |             |             |
| C6H5-H...Na+   |             |             |             | C6H5-CH2OH...Na+ |             |             |             |
| C              | 0.98556382  | -0.98556382 | -0.48773585 | C                | 0.08221119  | -2.05677228 | -0.79451855 |
| C              | -0.36074140 | -1.34630522 | -0.48773585 | C                | -0.85419979 | -1.11054505 | -1.20004731 |
| C              | 1.34630522  | 0.36074140  | -0.48773585 | C                | 1.17749113  | -1.65709079 | -0.02882296 |
| C              | -0.98556382 | 0.98556382  | -0.48773585 | C                | 0.38930569  | 0.63188917  | -0.08148476 |
| C              | 0.36074140  | 1.34630522  | -0.48773585 | C                | 1.32781373  | -0.32025168 | 0.32421823  |
| C              | -1.34630522 | -0.36074140 | -0.48773585 | C                | -0.70363177 | 0.23062043  | -0.84601508 |
| H              | 1.75154749  | -1.75154749 | -0.48773585 | H                | 1.91209176  | -2.38554592 | 0.29198641  |
| H              | -0.64111088 | -2.39265837 | -0.48773585 | H                | -1.70725458 | -1.41376908 | -1.79484637 |
| H              | -2.39265837 | -0.64111088 | -0.48773585 | C                | 0.58674007  | 2.07266959  | 0.32127017  |
| H              | -1.75154749 | 1.75154749  | -0.48773585 | H                | 0.61685834  | 2.13907828  | 1.41449085  |
| H              | 0.64111088  | 2.39265837  | -0.48773585 | H                | 1.54832059  | 2.42572082  | -0.06753107 |
| H              | 2.39265837  | 0.64111088  | -0.48773585 | H                | 2.18156977  | -0.01304287 | 0.92022875  |
| Na             | 0.00000000  | 0.00000000  | 1.86226415  | H                | -1.42805508 | 0.96994496  | -1.15832565 |
|                |             |             |             | H                | -0.03777848 | -3.09692308 | -1.07111185 |
|                |             |             |             | O                | -0.47546155 | 2.86020199  | -0.19401265 |
|                |             |             |             | H                | -0.34309402 | 3.77784899  | 0.06666638  |
|                |             |             |             | Na               | -0.99757704 | -1.09345858 | 1.52572230  |
| 15             |             |             |             | 15               |             |             |             |
| C6H5-BF2...Na+ |             |             |             | C6H5-CCH...Na+   |             |             |             |
| C              | -0.73054303 | 2.34517561  | 0.00000000  | C                | -0.28579743 | 0.77470604  | 0.00000000  |
| C              | -0.62132084 | 1.66046523  | -1.20980600 | C                | -0.39053414 | 0.07735854  | 1.21067500  |
| C              | -0.62132084 | 1.66046523  | 1.20980600  | C                | -0.39053414 | 0.07735854  | -1.21067500 |
| C              | -0.29022765 | -0.41514734 | 0.00000000  | C                | -0.70072410 | -1.98791718 | 0.00000000  |
| C              | -0.40217926 | 0.28667372  | 1.20800000  | C                | -0.59705084 | -1.29765026 | -1.20665700 |
| C              | -0.40217926 | 0.28667372  | -1.20800000 | C                | -0.59705084 | -1.29765026 | 1.20665700  |
| H              | -0.31671190 | -0.24911840 | -2.14609300 | H                | -0.30885864 | 0.62116220  | -2.14301400 |
| H              | -0.70685168 | 2.19665532  | -2.14674300 | H                | -0.30885864 | 0.62116220  | 2.14301400  |
| H              | -0.70685168 | 2.19665532  | 2.14674300  | H                | -0.67714482 | -1.83092403 | -2.14584400 |
| H              | -0.31671190 | -0.24911840 | 2.14609300  | H                | -0.67714482 | -1.83092403 | 2.14584400  |
| F              | 0.06347266  | -2.63248314 | -1.13455100 | C                | -0.07259508 | 2.19422858  | 0.00000000  |
| F              | 0.06347266  | -2.63248314 | 1.13455100  | C                | 0.10678913  | 3.38858658  | 0.00000000  |
| B              | -0.04673879 | -1.94157116 | 0.00000000  | H                | 0.26507225  | 4.44245136  | 0.00000000  |
| H              | -0.90121389 | 3.41510576  | 0.00000000  | H                | -0.86159381 | -3.05900380 | 0.00000000  |
| Na             | 1.85874113  | 1.34877598  | 0.00000000  | Na               | 1.83031937  | -0.95800431 | 0.00000000  |

16  
C6H5-CF3...Na+

|    |             |             |             |
|----|-------------|-------------|-------------|
| C  | 0.77349943  | 2.53436605  | 0.11467377  |
| C  | 0.85758197  | 1.84464342  | -1.09309851 |
| C  | 0.45496588  | 1.85446782  | 1.28846259  |
| C  | 0.30662161  | -0.19924450 | 0.04702211  |
| C  | 0.21948027  | 0.48312485  | 1.25822137  |
| C  | 0.62338237  | 0.47326906  | -1.13094696 |
| H  | 0.39280629  | 2.38935616  | 2.22754087  |
| H  | 1.10828724  | 2.37189744  | -2.00468464 |
| C  | 0.00189571  | -1.66644556 | 0.00155990  |
| F  | 0.31284126  | -2.28520597 | 1.15767392  |
| F  | -1.31130537 | -1.89904104 | -0.21948447 |
| F  | 0.67474957  | -2.29403687 | -0.98309787 |
| H  | -0.02351587 | -0.05372690 | 2.16586037  |
| H  | 0.69151189  | -0.07117449 | -2.06368680 |
| H  | 0.95869417  | 3.60093618  | 0.14158271  |
| Na | -1.78535602 | 1.64747088  | -0.27070931 |

16  
C6H5-CH3...Na+

|    |             |             |             |
|----|-------------|-------------|-------------|
| C  | 0.76107951  | 1.68685138  | 0.07922316  |
| C  | 0.77139588  | 0.99241616  | -1.12844088 |
| C  | 0.48510224  | 1.00224683  | 1.26072842  |
| C  | 0.22481894  | -1.07192817 | 0.02631532  |
| C  | 0.22124767  | -0.36529143 | 1.23154179  |
| C  | 0.50678622  | -0.37509615 | -1.15132720 |
| H  | 0.47932529  | 1.53117260  | 2.20627719  |
| H  | 0.98969591  | 1.51364746  | -2.05284474 |
| C  | -0.09430415 | -2.54607973 | -0.00586029 |
| H  | 0.20608634  | -3.03379724 | 0.92285033  |
| H  | -1.16830754 | -2.70658869 | -0.13389726 |
| H  | 0.41652763  | -3.04102334 | -0.83331739 |
| H  | 0.01068345  | -0.89263913 | 2.15589896  |
| H  | 0.52006244  | -0.91013009 | -2.09495370 |
| H  | 0.97038692  | 2.74936718  | 0.09993291  |
| Na | -1.78920166 | 0.80466163  | -0.19482075 |

15  
C6H5-CHO...Na+

|    |             |             |             |
|----|-------------|-------------|-------------|
| C  | 0.30629423  | 0.72184903  | 0.17786454  |
| C  | 0.18976073  | 0.25964206  | -1.13638744 |
| C  | 0.61316939  | -0.16275634 | 1.21238081  |
| C  | 0.68865153  | -1.97348196 | -0.37236277 |
| C  | 0.80508268  | -1.51419972 | 0.93782711  |
| C  | 0.38136411  | -1.08832590 | -1.40900499 |
| H  | 0.70080766  | 0.20859401  | 2.22817445  |
| H  | -0.04928941 | 0.96876476  | -1.91913151 |
| H  | 1.04335944  | -2.20414846 | 1.73752578  |
| H  | 0.29300531  | -1.45488457 | -2.42409372 |
| C  | 0.10502850  | 2.15605148  | 0.48530786  |
| O  | -0.16376397 | 3.00107759  | -0.33978550 |
| H  | 0.21694896  | 2.42879470  | 1.54993023  |
| H  | 0.83739501  | -3.02432879 | -0.58908579 |
| Na | -1.84256566 | -1.02946220 | 0.25101944  |

14  
C6H5-CN...Na+

|    |             |             |             |
|----|-------------|-------------|-------------|
| C  | -0.72515765 | -1.95079368 | 0.00000000  |
| C  | -0.61493727 | -1.26555249 | 1.20898600  |
| C  | -0.61493727 | -1.26555249 | -1.20898600 |
| C  | -0.28421738 | 0.79053637  | 0.00000000  |
| C  | -0.39416619 | 0.10698348  | -1.21523800 |
| C  | -0.39416619 | 0.10698348  | 1.21523800  |
| C  | -0.05556880 | 2.21204685  | 0.00000000  |
| N  | 0.12804317  | 3.35356424  | 0.00000000  |
| H  | -0.70084926 | -1.79966818 | 2.14648100  |
| H  | -0.70084926 | -1.79966818 | -2.14648100 |
| H  | -0.30649239 | 0.65205239  | -2.14582200 |
| H  | -0.30649239 | 0.65205239  | 2.14582200  |
| H  | -0.89711869 | -3.01987711 | 0.00000000  |
| Na | 1.86494586  | -0.96070455 | 0.00000000  |

|                  |             |             |             |
|------------------|-------------|-------------|-------------|
| 18               |             |             |             |
| C6H5-COCH3...Na+ |             |             |             |
| C                | -0.05411738 | 0.42881609  | -0.27958267 |
| C                | -1.24833866 | -0.29368905 | -0.36770986 |
| C                | 1.16685324  | -0.23761751 | -0.41326203 |
| C                | 0.00069580  | -2.32626573 | -0.71959497 |
| C                | 1.19363310  | -1.61275973 | -0.63287202 |
| C                | -1.22119420 | -1.66524234 | -0.58675650 |
| H                | 2.10003314  | 0.30713203  | -0.34755570 |
| H                | -2.18296754 | 0.24142878  | -0.26140324 |
| H                | 2.14238046  | -2.12431733 | -0.73574491 |
| H                | -2.14826052 | -2.22067253 | -0.65430175 |
| C                | -0.13496373 | 1.90602958  | -0.04249711 |
| O                | -1.21403781 | 2.45602872  | 0.06943792  |
| C                | 1.14904409  | 2.69879204  | 0.05479388  |
| H                | 1.72826116  | 2.60892367  | -0.86703481 |
| H                | 1.76759762  | 2.33120773  | 0.87674897  |
| H                | 0.89572197  | 3.74229032  | 0.22669644  |
| H                | 0.02199396  | -3.39557166 | -0.89037365 |
| Na               | 0.02526079  | -1.32063917 | 1.82021391  |

|                   |             |             |             |
|-------------------|-------------|-------------|-------------|
| 19                |             |             |             |
| C6H5-COOCH3...Na+ |             |             |             |
| C                 | -0.15127839 | -0.02422634 | -0.30042867 |
| C                 | -1.27182047 | 0.80801421  | -0.32857965 |
| C                 | 1.12797633  | 0.50926078  | -0.46999876 |
| C                 | 0.16349017  | 2.70998807  | -0.69604438 |
| C                 | 1.28170689  | 1.87821758  | -0.66778093 |
| C                 | -1.11317707 | 2.17494726  | -0.52645933 |
| H                 | 1.98877381  | -0.14484021 | -0.44636434 |
| H                 | -2.25138610 | 0.36766864  | -0.19440590 |
| H                 | 2.27228786  | 2.29537336  | -0.79963740 |
| H                 | -1.98102159 | 2.82217844  | -0.54862519 |
| C                 | -0.37634491 | -1.48004036 | -0.08542635 |
| O                 | -1.46545367 | -1.98775177 | 0.06621576  |
| O                 | 0.76506252  | -2.18828594 | -0.07571626 |
| C                 | 0.60056484  | -3.59857406 | 0.12850199  |
| H                 | 1.60418311  | -4.01195041 | 0.10857422  |
| H                 | 0.12241947  | -3.78221571 | 1.08883060  |
| H                 | -0.01075409 | -4.02090779 | -0.66679776 |
| H                 | 0.28676228  | 3.77508271  | -0.85020356 |
| Na                | 0.18228728  | 1.65839907  | 1.82381180  |

|                 |             |             |             |
|-----------------|-------------|-------------|-------------|
| 16              |             |             |             |
| C6H5-COOH...Na+ |             |             |             |
| C               | 0.01446744  | -2.29864164 | -0.74143045 |
| C               | 1.21247973  | -1.59499972 | -0.62878807 |
| C               | -1.20589163 | -1.63326178 | -0.62499268 |
| C               | -0.02796323 | 0.44065381  | -0.28307030 |
| C               | -1.22882542 | -0.26262956 | -0.39564069 |
| C               | 1.19529209  | -0.22265432 | -0.39917376 |
| H               | 2.15800907  | -2.11425654 | -0.71962634 |
| H               | -2.13471302 | -2.18226338 | -0.71290437 |
| H               | 2.11801357  | 0.33397874  | -0.30995990 |
| H               | -2.16116766 | 0.27848087  | -0.30120273 |
| C               | -0.10236912 | 1.90277681  | -0.03819835 |
| O               | -1.12783702 | 2.53528900  | 0.07192029  |
| O               | 1.11029080  | 2.48962435  | 0.05484696  |
| H               | 0.95004984  | 3.43359034  | 0.21341256  |
| H               | 0.03141126  | -3.36663199 | -0.92013656 |
| Na              | 0.00323887  | -1.32451513 | 1.85491320  |

|              |             |             |             |
|--------------|-------------|-------------|-------------|
| 13           |             |             |             |
| C6H5-F...Na+ |             |             |             |
| C            | -0.19801494 | 1.07370703  | 0.00000000  |
| C            | -0.34573765 | 0.42890614  | 1.21658000  |
| C            | -0.34573765 | 0.42890614  | -1.21658000 |
| C            | -0.81284602 | -1.60999427 | 0.00000000  |
| C            | -0.65686721 | -0.92915601 | -1.20644900 |
| C            | -0.65686721 | -0.92915601 | 1.20644900  |
| F            | 0.10428797  | 2.39324134  | 0.00000000  |
| H            | -0.21846413 | 0.98444752  | 2.13600000  |
| H            | -0.21846413 | 0.98444752  | -2.13600000 |
| H            | -0.77729061 | -1.45479702 | -2.14537100 |
| H            | -0.77729061 | -1.45479702 | 2.14537100  |
| H            | -1.05451171 | -2.66485069 | 0.00000000  |
| Na           | 1.83671396  | -0.79208187 | 0.00000000  |



21

C6H5-NCH3\_2...Na+

|    |             |             |             |
|----|-------------|-------------|-------------|
| C  | 0.16674153  | 0.41363130  | 0.00000000  |
| C  | 0.33712789  | -0.29734315 | 1.20480793  |
| C  | 0.33712789  | -0.29734315 | -1.20480793 |
| C  | 0.78423994  | -2.35350912 | 0.00000000  |
| C  | 0.63461238  | -1.65568208 | -1.19537793 |
| C  | 0.63461238  | -1.65568208 | 1.19537793  |
| H  | 0.23611128  | 0.20327502  | 2.15666636  |
| H  | 0.75469544  | -2.16966241 | 2.14181038  |
| H  | 0.75469544  | -2.16966241 | -2.14181038 |
| H  | 0.23611128  | 0.20327502  | -2.15666636 |
| N  | -0.16663527 | 1.76239103  | 0.00000000  |
| C  | -0.00013440 | 2.50422019  | -1.23492805 |
| H  | -0.27325821 | 3.54273206  | -1.05913561 |
| H  | -0.66461075 | 2.11704988  | -2.00861254 |
| H  | 1.03148169  | 2.46963891  | -1.61084506 |
| C  | -0.00013440 | 2.50422019  | 1.23492805  |
| H  | -0.66461075 | 2.11704988  | 2.00861254  |
| H  | -0.27325821 | 3.54273206  | 1.05913561  |
| H  | 1.03148169  | 2.46963891  | 1.61084506  |
| H  | 1.01858486  | -3.41008147 | 0.00000000  |
| Na | -1.76237602 | -1.47525411 | 0.00000000  |

15

C6H5-NH2...Na+

|    |             |             |             |
|----|-------------|-------------|-------------|
| C  | 0.21335916  | -1.08296565 | 0.00000000  |
| C  | 0.35108808  | -0.38326701 | -1.20529550 |
| C  | 0.35108808  | -0.38326701 | 1.20529550  |
| C  | 0.76406558  | 1.67529025  | 0.00000000  |
| C  | 0.62429574  | 0.98020399  | 1.19985750  |
| C  | 0.62429574  | 0.98020399  | -1.19985750 |
| H  | 0.23669323  | -0.91197430 | 2.14520650  |
| H  | 0.73011936  | 1.50169020  | 2.14355150  |
| H  | 0.73011936  | 1.50169020  | -2.14355150 |
| H  | 0.23669323  | -0.91197430 | -2.14520650 |
| H  | 0.14949527  | -2.94176826 | 0.83449000  |
| H  | 0.14949527  | -2.94176826 | -0.83449000 |
| N  | -0.11411218 | -2.44073126 | 0.00000000  |
| H  | 0.97833962  | 2.73608226  | 0.00000000  |
| Na | -1.81648403 | 0.75781363  | 0.00000000  |

18

C6H5-NHCH3...Na+

|    |             |             |             |
|----|-------------|-------------|-------------|
| C  | -0.25860192 | -0.65183135 | -0.22533118 |
| C  | 1.07266642  | -0.21301427 | -0.20158507 |
| C  | -1.26842058 | 0.28461976  | -0.50855968 |
| C  | 0.37230582  | 2.04934147  | -0.72615628 |
| C  | -0.95379155 | 1.61216379  | -0.75612469 |
| C  | 1.37378446  | 1.12618681  | -0.44665237 |
| H  | -2.30328497 | -0.04083140 | -0.52208798 |
| H  | -1.75116873 | 2.31311395  | -0.97268461 |
| H  | 2.40964861  | 1.44317990  | -0.42050896 |
| H  | 1.87425101  | -0.90789026 | 0.00971584  |
| N  | -0.60439540 | -1.96724215 | 0.05252332  |
| H  | -1.49999280 | -2.24252316 | -0.31611017 |
| C  | 0.40234484  | -3.00803065 | 0.05308779  |
| H  | -0.09308596 | -3.96887128 | 0.18183736  |
| H  | 1.08579695  | -2.87172891 | 0.89314016  |
| H  | 0.98945416  | -3.03212874 | -0.87357725 |
| H  | 0.61517084  | 3.08635463  | -0.91836501 |
| Na | -0.13979512 | 1.16321881  | 1.76717330  |

16

C6H5-NHOH...Na+

|    |             |             |             |
|----|-------------|-------------|-------------|
| C  | 0.80533908  | 2.00577902  | 0.28471228  |
| C  | -0.14582012 | 1.58297710  | 1.21386700  |
| C  | 1.33321633  | 1.08203993  | -0.61205396 |
| C  | -0.02653012 | -0.66393720 | 0.33736101  |
| C  | 0.92551142  | -0.25112358 | -0.59333196 |
| C  | -0.56335703 | 0.25858369  | 1.24226641  |
| H  | -1.31364060 | -0.06328790 | 1.95649370  |
| H  | -0.56710799 | 2.28808875  | 1.92019652  |
| H  | 2.07663936  | 1.39470075  | -1.33551185 |
| H  | 1.34884117  | -0.97022108 | -1.27936643 |
| N  | -0.53442614 | -1.98525390 | 0.36278375  |
| H  | -0.62449230 | -2.31800555 | 1.31557823  |
| O  | 0.31813450  | -2.89936748 | -0.28493553 |
| H  | -0.23099081 | -3.26967549 | -0.98730873 |
| H  | 1.12918799  | 3.03852380  | 0.26379344  |
| Na | -1.32660792 | 1.17324364  | -1.21370924 |

14  
C6H5-NO...Na+

|    |             |             |             |
|----|-------------|-------------|-------------|
| C  | 0.29709857  | 0.74390576  | 0.17932342  |
| C  | 0.61547549  | -0.12133145 | 1.22277152  |
| C  | 0.17681677  | 0.29192403  | -1.13700077 |
| C  | 0.70220773  | -1.93285178 | -0.35860454 |
| C  | 0.38182714  | -1.05472333 | -1.39980401 |
| C  | 0.81962718  | -1.47116005 | 0.95062492  |
| H  | -0.07207831 | 0.99631764  | -1.91959872 |
| H  | 0.69666210  | 0.28019283  | 2.22544001  |
| H  | 0.29406940  | -1.42839608 | -2.41217719 |
| H  | 1.06780954  | -2.15762923 | 1.74981490  |
| N  | 0.10605011  | 2.11800334  | 0.56530638  |
| O  | -0.16945155 | 2.86373932  | -0.34115198 |
| H  | 0.86033142  | -2.98231683 | -0.57409141 |
| Na | -1.83562270 | -1.01624413 | 0.26898366  |

15  
C6H5-NO2...Na+

|    |             |             |             |
|----|-------------|-------------|-------------|
| C  | -0.28106830 | -0.46446783 | 0.00000000  |
| C  | -0.39950020 | 0.18953641  | -1.21951500 |
| C  | -0.39950020 | 0.18953641  | 1.21951500  |
| C  | -0.77079300 | 2.23988837  | 0.00000000  |
| C  | -0.64732494 | 1.55807345  | -1.21000200 |
| C  | -0.64732494 | 1.55807345  | 1.21000200  |
| H  | -0.74377202 | 2.09067322  | -2.14716400 |
| H  | -0.29871563 | -0.36701580 | -2.13988900 |
| H  | -0.29871563 | -0.36701580 | 2.13988900  |
| H  | -0.74377202 | 2.09067322  | 2.14716400  |
| O  | 0.08142926  | -2.46625072 | -1.07799600 |
| O  | 0.08142926  | -2.46625072 | 1.07799600  |
| N  | -0.01900837 | -1.91161436 | 0.00000000  |
| H  | -0.96369198 | 3.30511448  | 0.00000000  |
| Na | 1.88653884  | 1.31500376  | 0.00000000  |

17  
C6H5-OCF3...Na+

|    |             |             |             |
|----|-------------|-------------|-------------|
| C  | 0.31948820  | -0.25219554 | 0.37191705  |
| C  | 0.45006383  | -1.21951786 | 1.36092323  |
| C  | 0.38644652  | -0.57366499 | -0.97763757 |
| C  | 0.72421232  | -2.89371713 | -0.35683900 |
| C  | 0.59068192  | -1.90818355 | -1.32910488 |
| C  | 0.65297925  | -2.54344155 | 0.99077586  |
| H  | 0.28490711  | 0.17843197  | -1.74543054 |
| H  | 0.39070159  | -0.91960613 | 2.39877850  |
| H  | 0.64438722  | -2.16914165 | -2.37839104 |
| H  | 0.75524568  | -3.30035230 | 1.75799055  |
| C  | -0.02507832 | 2.08631700  | 0.03911492  |
| O  | 0.11955556  | 1.03990655  | 0.86808945  |
| F  | -1.08819967 | 1.96067646  | -0.77596048 |
| F  | 1.05034120  | 2.28005161  | -0.74593298 |
| F  | -0.19835124 | 3.17683681  | 0.78064474  |
| H  | 0.88225553  | -3.92490276 | -0.64480145 |
| Na | -1.85280150 | -1.91957671 | -0.02332007 |

14  
C6H5-OH...Na+

|    |             |             |             |
|----|-------------|-------------|-------------|
| C  | 0.20639797  | -1.08305918 | 0.00394661  |
| C  | 0.35113081  | -0.40713753 | 1.21453495  |
| C  | 0.34534863  | -0.40285968 | -1.20433396 |
| C  | 0.77747205  | 1.64694607  | 0.00543787  |
| C  | 0.63071959  | 0.96125962  | -1.19681584 |
| C  | 0.63569963  | 0.95333324  | 1.20795113  |
| H  | 0.23170909  | -0.93371414 | -2.14403693 |
| H  | 0.73763491  | 1.48480321  | -2.13905683 |
| H  | 0.74757696  | 1.47572891  | 2.15026846  |
| H  | 0.23800907  | -0.96010369 | 2.13803793  |
| O  | -0.07301777 | -2.41959106 | 0.06323234  |
| H  | -0.15064260 | -2.77890474 | -0.82889407 |
| H  | 0.99908484  | 2.70634306  | 0.00733255  |
| Na | -1.80907657 | 0.75924370  | 0.01146960  |

| 17             |             |             |             |
|----------------|-------------|-------------|-------------|
| C6H5-OMe...Na+ |             |             |             |
| C              | 0.36873113  | 0.65903438  | 0.08094942  |
| C              | -0.27377803 | 0.21982609  | -1.07682669 |
| C              | 1.05914893  | -0.25189011 | 0.88752150  |
| C              | 0.46525543  | -2.04519496 | -0.62159165 |
| C              | 1.10463318  | -1.59231203 | 0.53554560  |
| C              | -0.21805564 | -1.13436644 | -1.41692508 |
| H              | -0.81286521 | 0.90606751  | -1.71452484 |
| H              | -0.71901991 | -1.46913789 | -2.31721325 |
| H              | 1.64187510  | -2.28959128 | 1.16682548  |
| H              | 1.54778043  | 0.11854274  | 1.77953684  |
| O              | 0.37976629  | 1.95292903  | 0.50782613  |
| C              | -0.30667106 | 2.91103084  | -0.27750767 |
| H              | -1.37158133 | 2.67362892  | -0.34165172 |
| H              | 0.11963081  | 2.97117209  | -1.28207611 |
| H              | -0.17553030 | 3.86201297  | 0.23132317  |
| H              | 0.50198644  | -3.09197242 | -0.89454049 |
| Na             | -1.54236272 | -1.08190195 | 0.96751994  |

| 17              |             |             |             |
|-----------------|-------------|-------------|-------------|
| C6H5-SCH3...Na+ |             |             |             |
| C               | -0.25940179 | -0.35394311 | -0.25577099 |
| C               | 1.03167761  | 0.12723266  | -0.48106587 |
| C               | -1.33655499 | 0.54237358  | -0.27524044 |
| C               | 0.16799459  | 2.37472306  | -0.74104046 |
| C               | -1.12219594 | 1.89287462  | -0.51574022 |
| C               | 1.23707755  | 1.48625730  | -0.72189838 |
| H               | 1.88291969  | -0.53967249 | -0.47230145 |
| H               | 2.24467861  | 1.84499500  | -0.89504261 |
| H               | -1.96621607 | 2.57188385  | -0.52726937 |
| H               | -2.34138478 | 0.17435498  | -0.10093127 |
| S               | -0.65509640 | -2.05135207 | 0.06101931  |
| C               | 0.96441440  | -2.85438369 | 0.00324487  |
| H               | 1.62756515  | -2.46962284 | 0.77756940  |
| H               | 1.42574527  | -2.75030456 | -0.97845247 |
| H               | 0.77680573  | -3.91030378 | 0.19358454  |
| H               | 0.33427476  | 3.42800990  | -0.92850794 |
| Na              | 0.21809867  | 1.38013514  | 1.80728284  |

| 14            |             |             |             |
|---------------|-------------|-------------|-------------|
| C6H5-SH...Na+ |             |             |             |
| C             | 0.25778244  | -0.70453212 | -0.01008510 |
| C             | 0.38300801  | -0.02547823 | 1.20500248  |
| C             | 0.37321737  | 0.00093936  | -1.20931162 |
| C             | 0.73686260  | 2.05168166  | 0.01989331  |
| C             | 0.61172135  | 1.37291006  | -1.18927189 |
| C             | 0.62118188  | 1.34492450  | 1.21535966  |
| H             | 0.27809931  | -0.51397252 | -2.15792035 |
| H             | 0.69928372  | 1.90897743  | -2.12626647 |
| H             | 0.71644185  | 1.86069189  | 2.16283664  |
| H             | 0.29419758  | -0.56860490 | 2.13838909  |
| S             | -0.04553769 | -2.45234412 | 0.05172967  |
| H             | -0.08653652 | -2.64282145 | -1.27501881 |
| H             | 0.92219479  | 3.11793384  | 0.03117757  |
| Na            | -1.81797450 | 1.07569366  | 0.01905515  |

| 16              |             |             |             |
|-----------------|-------------|-------------|-------------|
| C6H5-SiF3...Na+ |             |             |             |
| C               | 0.31389910  | 0.12063197  | 0.01080432  |
| C               | 0.38371798  | 0.82141451  | 1.22251085  |
| C               | 0.47550320  | 0.81956018  | -1.19321134 |
| C               | 0.75287145  | 2.88115489  | 0.02533281  |
| C               | 0.69232072  | 2.19430500  | -1.18561831 |
| C               | 0.60059300  | 2.19618715  | 1.22923633  |
| Si              | 0.00830915  | -1.68430770 | 0.00053410  |
| F               | -1.54051576 | -2.07163167 | -0.06621209 |
| F               | 0.58160879  | -2.36839414 | 1.32526962  |
| F               | 0.69385013  | -2.37324385 | -1.26713276 |
| H               | 0.43981177  | 0.29001970  | -2.13832921 |
| H               | 0.27635069  | 0.29330250  | 2.16297298  |
| H               | 0.81746720  | 2.72688686  | -2.11981232 |
| H               | 0.65456297  | 2.73021658  | 2.16940885  |
| H               | 0.92295246  | 3.95063055  | 0.03095792  |
| Na              | -1.83230858 | 1.88265059  | -0.06312060 |

16

C6H5-SiH3...Na+

|    |             |             |             |
|----|-------------|-------------|-------------|
| C  | 0.28081314  | -0.66726283 | -0.00825691 |
| C  | 0.43385541  | 0.04176468  | 1.19048237  |
| C  | 0.35671793  | 0.04340249  | -1.21341188 |
| C  | 0.71352599  | 2.10956591  | -0.02027470 |
| C  | 0.56918403  | 1.42027568  | -1.22244658 |
| C  | 0.64654683  | 1.41867039  | 1.18771979  |
| Si | -0.03710074 | -2.51649064 | 0.00066864  |
| H  | -1.49531259 | -2.81807310 | 0.03956607  |
| H  | 0.59493099  | -3.12630596 | 1.20246111  |
| H  | 0.52979048  | -3.12748228 | -1.23262191 |
| H  | 0.25353303  | -0.48081281 | -2.15766250 |
| H  | 0.39138930  | -0.48375457 | 2.13866799  |
| H  | 0.62592317  | 1.95263871  | -2.16414629 |
| H  | 0.76359333  | 1.94975774  | 2.12456140  |
| H  | 0.88131710  | 3.17964618  | -0.02494801 |
| Na | -1.82087403 | 1.08970519  | 0.05289897  |

### H-X...Na<sup>+</sup> Dimer geometries

|           |            |            |           |
|-----------|------------|------------|-----------|
| 3         |            |            |           |
| H-H...Na+ |            |            |           |
| H         | 0.2508900  | -2.9100100 | 0.0000000 |
| Na        | 0.0037262  | 0.4954631  | 0.0000000 |
| H         | -0.2970630 | -2.4104193 | 0.0000000 |

|             |            |            |            |
|-------------|------------|------------|------------|
| 5           |            |            |            |
| H-BF2...Na+ |            |            |            |
| F           | -0.1060573 | 1.5014705  | 1.1345510  |
| F           | -0.1060573 | 1.5014705  | -1.1345510 |
| B           | 0.2863458  | 0.9222247  | 0.0000000  |
| Na          | -0.0466091 | -2.8654367 | 0.0000000  |
| H           | 0.9545187  | -0.0640987 | 0.0000000  |

|             |            |            |           |
|-------------|------------|------------|-----------|
| 5           |            |            |           |
| H-CCH...Na+ |            |            |           |
| C           | 0.3887913  | 1.3427951  | 0.0000000 |
| C           | -0.2674724 | 2.3566924  | 0.0000000 |
| Na          | -0.0437395 | -2.3137843 | 0.0000000 |
| H           | -0.8465392 | 3.2513242  | 0.0000000 |
| H           | 0.8823287  | 0.4204312  | 0.0000000 |

|             |            |            |            |
|-------------|------------|------------|------------|
| 6           |            |            |            |
| H-CF3...Na+ |            |            |            |
| C           | -0.0000420 | 0.7156255  | -0.1800380 |
| F           | -1.0962508 | 1.4899272  | -0.3022441 |
| F           | 0.0215186  | 0.2763720  | 1.0982616  |
| F           | 1.0745905  | 1.5148383  | -0.3302978 |
| Na          | 0.0001148  | -3.0593118 | -0.1970571 |
| H           | 0.0002438  | -0.1056492 | -0.8872375 |

|               |            |            |            |
|---------------|------------|------------|------------|
| 7             |            |            |            |
| H-CH2OH...Na+ |            |            |            |
| C             | 0.6469806  | 1.1779491  | -0.0133753 |
| H             | 0.8766917  | 0.8427691  | 1.0041393  |
| H             | 1.4422562  | 1.8597342  | -0.3345516 |
| O             | -0.6113077 | 1.8333659  | -0.0470702 |
| H             | -0.5862664 | 2.5948821  | 0.5420111  |
| Na            | -0.1221083 | -2.4817724 | -0.0047665 |
| H             | 0.6267609  | 0.3146588  | -0.6777344 |

|             |            |            |            |
|-------------|------------|------------|------------|
| 6           |            |            |            |
| H-CH3...Na+ |            |            |            |
| C           | 0.0042713  | -1.9684649 | 0.0000655  |
| H           | 0.1277161  | -2.5850821 | 0.8917778  |
| H           | -1.0325331 | -1.6219233 | -0.0241296 |
| H           | 0.1646255  | -2.5981168 | -0.8765351 |
| Na          | 0.0006264  | 1.7913007  | 0.0000096  |
| H           | 0.6922124  | -1.1247030 | 0.0082057  |

|             |            |            |            |
|-------------|------------|------------|------------|
| 5           |            |            |            |
| H-CHO...Na+ |            |            |            |
| C           | 0.5011022  | -1.3271499 | 0.0317570  |
| O           | -0.4880129 | -2.0237709 | -0.0271315 |
| H           | 1.3830115  | -1.5531589 | -0.5939360 |
| Na          | -0.0998187 | 2.3650547  | -0.0133093 |
| H           | 0.6040512  | -0.4405426 | 0.6896457  |

|            |            |            |           |
|------------|------------|------------|-----------|
| 4          |            |            |           |
| H-CN...Na+ |            |            |           |
| C          | 0.3450652  | -1.4131146 | 0.0000000 |
| N          | -0.3053018 | -2.3690424 | 0.0000000 |
| Na         | -0.0487432 | 2.2746548  | 0.0000000 |
| H          | 0.8573697  | -0.4996499 | 0.0000000 |

|               |            |            |            |
|---------------|------------|------------|------------|
| 8             |            |            |            |
| H-COCH3...Na+ |            |            |            |
| C             | -0.1734371 | 0.9067706  | -0.2629960 |
| O             | -1.2314474 | 1.3611136  | 0.1289430  |
| C             | 1.1340784  | 1.5766420  | 0.0951792  |
| H             | 1.6681139  | 1.8861798  | -0.8061139 |
| H             | 1.7795692  | 0.8907969  | 0.6486183  |
| H             | 0.9163899  | 2.4481234  | 0.7081582  |
| Na            | -0.0134084 | -2.8068837 | 0.0368674  |
| H             | -0.1503770 | -0.0098904 | -0.8919767 |

|                |            |            |            |
|----------------|------------|------------|------------|
| 9              |            |            |            |
| H-COOCH3...Na+ |            |            |            |
| C              | 0.4445342  | 0.3342533  | -0.3940206 |
| O              | 1.4479334  | 0.7529212  | 0.1396753  |
| O              | -0.7286076 | 0.9874112  | -0.3535230 |
| C              | -0.7077558 | 2.2246837  | 0.3720107  |
| H              | -1.7187581 | 2.6146738  | 0.3063687  |
| H              | -0.4262003 | 2.0440092  | 1.4077044  |
| H              | 0.0048013  | 2.9105234  | -0.0823731 |
| Na             | -0.2187412 | -3.2868753 | 0.1105145  |
| H              | 0.3893722  | -0.6045792 | -0.9559287 |

|              |            |            |            |
|--------------|------------|------------|------------|
| 6            |            |            |            |
| H-COOH...Na+ |            |            |            |
| C            | -0.1088487 | 0.9331897  | -0.2629891 |
| O            | -1.1301021 | 1.4565387  | 0.1203248  |
| O            | 1.1075597  | 1.4195836  | 0.0646741  |
| H            | 0.9535061  | 2.2011582  | 0.6190212  |
| Na           | -0.0058802 | -2.7962273 | 0.0391429  |
| H            | -0.0610853 | 0.0413105  | -0.8938819 |

3  
H-F...Na+  
F 0.0509304 -1.9382085 0.0000000  
Na 0.0181998 1.6876035 0.0000000  
H -0.5600930 -1.2586844 0.0000000

11  
H-NCH3\_2...Na+  
N -0.1043752 -0.6987899 0.0000000  
C 0.0481188 -1.4436245 1.2349280  
H 0.7232530 -2.2786678 1.0591356  
H 0.4952643 -0.8179325 2.0086125  
H -0.9068728 -1.8353115 1.6108451  
C 0.0481188 -1.4436245 -1.2349280  
H 0.4952643 -0.8179325 -2.0086125  
H 0.7232530 -2.2786678 -1.0591356  
H -0.9068728 -1.8353115 -1.6108451  
Na 0.0226397 2.9085085 0.0000000  
H -0.7208093 0.0872520 0.0000000

5  
H-NH2...Na+  
H -0.0500866 2.4452956 0.8344900  
H -0.0500866 2.4452956 -0.8344900  
N -0.0436366 1.8791814 0.0000000  
Na -0.0196500 -1.7441022 0.0000000  
H 0.6239930 1.1367282 0.0000000

8  
H-NHCH3...Na+  
N 0.5808970 1.0205973 0.0192483  
H 1.5030247 1.3849693 0.1944010  
C -0.4757494 2.0106326 0.0094796  
H -0.2060564 2.8116225 0.6957184  
H -1.4092748 1.5699706 0.3640500  
H -0.6482859 2.4384849 -0.9860904  
Na -0.0921519 -2.5153103 0.0140779  
H 0.5615293 0.2519421 -0.6174668

6  
H-NHOH...Na+  
N 0.5742220 1.0704763 -0.0688767  
H 1.4266998 1.6074541 0.0387771  
O -0.4810535 1.9914697 0.0731389  
H -0.9341444 1.9568439 -0.7786266  
Na -0.1082290 -2.4817574 0.0010191  
H 0.5300026 0.3292797 0.6113241

4  
H-NO...Na+  
N -0.5609532 -1.3465312 0.0706492  
O 0.4817142 -1.9487862 0.0088122  
Na 0.0697095 2.2977267 0.0153665  
H -0.6396537 -0.5225536 -0.5964403

5  
H-NO2...Na+  
O -0.1259127 1.4474705 1.0779960  
O -0.1259127 1.4474705 -1.0779960  
N 0.2131584 0.9972039 0.0000000  
Na -0.0383067 -2.7416382 0.0000000  
H 0.8348283 0.1716626 0.0000000

7  
H-OCF3...Na+  
C -0.0188107 0.9111127 0.0045088  
O -0.9071244 0.0215365 0.4763622  
F 0.8833352 0.3551001 -0.8245529  
F 0.6727043 1.5239677 0.9825559  
F -0.6877804 1.8392731 -0.6738136  
Na 0.0174936 -3.4922900 -0.0150124  
H -0.6260654 -0.7271350 0.9933745

4  
H-OH...Na+  
O 0.0585762 -1.9171631 0.0516276  
H -0.8460316 -2.1968179 -0.1341125  
Na 0.0078777 1.7047202 0.0206373  
H 0.2982680 -1.1940132 -0.5198924

7  
H-OMe...Na+  
O 0.6698721 -1.1025034 -0.0420879  
C -0.5036873 -1.8944495 -0.0035628  
H -1.3840678 -1.3020020 -0.2651813  
H -0.6403856 -2.3432956 0.9835333  
H -0.3587682 -2.6774135 -0.7427783  
Na -0.0616935 2.4443388 -0.0134557  
H 0.7206566 -0.3576139 0.5488245

7  
H-SCH3...Na+  
S -0.6582920 1.0032786 -0.0355717  
C 1.0118841 1.6966253 -0.0073730  
H 1.7406808 0.9964545 -0.4148096  
H 1.2993310 2.0021323 0.9983247  
H 0.9758757 2.5782271 -0.6460241  
Na 0.0873193 -2.8736825 -0.0198701  
H -0.5457765 -0.0692591 0.7628563

|            |            |            |            |
|------------|------------|------------|------------|
| 4          |            |            |            |
| H-SH...Na+ |            |            |            |
| S          | 0.0580000  | -1.5338008 | 0.0411719  |
| H          | -1.2724425 | -1.6885305 | -0.0236798 |
| Na         | 0.0176481  | 2.4143218  | 0.0224588  |
| H          | 0.1214396  | -0.4620566 | -0.7569510 |

|              |            |            |            |
|--------------|------------|------------|------------|
| 6            |            |            |            |
| H-SiF3...Na+ |            |            |            |
| Si           | -0.0001318 | 0.6146891  | -0.1526802 |
| F            | 0.0142780  | 0.2167749  | 1.3948308  |
| F            | -1.3045300 | 1.5107712  | -0.3698281 |
| F            | 1.2901869  | 1.5260828  | -0.3893610 |
| Na           | 0.0002615  | -3.3988802 | -0.2325421 |
| H            | -0.0004570 | -0.5378265 | -1.0551752 |

|              |            |            |            |
|--------------|------------|------------|------------|
| 6            |            |            |            |
| H-SiH3...Na+ |            |            |            |
| Si           | 0.0009609  | -1.5280657 | -0.0002778 |
| H            | 1.3857535  | -1.1513423 | -0.3993713 |
| H            | -0.5935972 | -2.3392260 | -1.0976217 |
| H            | 0.0823503  | -2.3430161 | 1.2426678  |
| Na           | 0.0008347  | 2.4955177  | -0.0002335 |
| H            | -0.8472960 | -0.3161822 | 0.2462948  |
